---

1 **RESEARCH ARTICLE**

2

3 **A novel thermostable aspartic protease from *Talaromyces leycettanus* and its specific**  
4 **autocatalytic activation through an intermediate transition state**

5

6 Yujie Guo<sup>1</sup>, Tao Tu<sup>1</sup>, Yaxin Ren<sup>1</sup>, Yaru Wang<sup>1</sup>, Yingguo Bai<sup>1</sup>, Xiaoyun Su<sup>1</sup>, Yuan  
7 Wang<sup>1</sup>, Bin Yao<sup>1</sup>, Huoqing Huang<sup>1\*</sup>, Huiying Luo<sup>1\*</sup>

8

9 <sup>1</sup>Key Laboratory for Feed Biotechnology of the Ministry of Agriculture, Feed Research  
10 Institute, Chinese Academy of Agricultural Sciences, Beijing 100081, P. R. China

11 Running title: Insights into a specific auto-activation of pro*Tl*APA1

12 \* Corresponding authors.

13 *E-mail addresses:* luohuiying@caas.cn (H. Luo), huanghuoqing@caas.cn (H. Huang).

## 14 **ABSTRACT**

15 Aspartic proteases exhibit optimum enzyme activity under acidic condition and  
16 have been extensively used in food, fermentation and leather industries. In this study,  
17 a novel aspartic protease precursor (pro*TlAPA1*) from *Talaromyces leycettanus* was  
18 identified and successfully expressed in *Pichia pastoris*. Subsequently, the  
19 auto-activation processing of the zymogen pro*TlAPA1* was studied by SDS-PAGE  
20 and N-terminal sequencing, under different processing conditions. *TlAPA1* shared the  
21 highest identity of 70.3 % with the aspartic endopeptidase from *Byssochlamys*  
22 *spectabilis* (GAD91729) and was classified into a new subgroup of the aspartic  
23 protease A1 family, based on evolutionary analysis. Mature *TlAPA1* protein displayed  
24 an optimal activity at 60 °C and remained stable at temperatures of 55 °C and below,  
25 indicating the thermostable nature of *TlAPA1* aspartic protease. During the  
26 auto-activation processing of pro*TlAPA1*, a 45 kDa intermediate was identified that  
27 divided the processing mechanism into two steps: formation of intermediates, and  
28 activation of the mature protein (*TlAPA1*). The former step was completely induced  
29 by pH of the buffer, while the latter process depended on protease activity. The  
30 discovery of the novel aspartic protease *TlAPA1* and study of its activation process  
31 will contribute to a better understanding of the mechanism of aspartic proteases  
32 auto-activation.

## 33 **IMPORTANCE**

34 The novel aspartic protease *TlAPA1* was identified from *T. leycettanus* and  
35 expressed as a zymogen (pro*TlAPA1*) in *P. pastoris*. Enzymatic characteristics of the

36 mature protein were studied and the specific pattern of zymogen conversion was  
37 described. The auto-activation processing of proTIAPA1 proceeded in two stages and  
38 an intermediate was identified in this process. These results describe a new subgroup  
39 of aspartic protease A1 family and provide insights into a novel mode of activation  
40 processing in aspartic proteases.

41

42 **KEYWORDS:** aspartic protease; *Talaromyces leycettanus*; molecular evolution;  
43 autoproteolytic processing;

44

## 45 INTRODUCTION

46 Proteases (EC 3.4.11-24) make up a large share of the total global industrial  
47 enzymes (1). They have extensive applications in the dairy, baking, beverages,  
48 brewing, meat and functional food industries (1, 2). On the basis of the optimal pH of  
49 hydrolysis, proteases have been grouped into three categories—acidic, neutral, and  
50 alkaline proteases. They can also be classified into serine, cysteine, metallo and  
51 aspartic proteases, depending upon their catalytic residues. Aspartic proteases (EC  
52 3.4.23) have two aspartic residues at their catalytic center, which are vital for  
53 hydrolytic cleavage of peptide bonds (3). The activity of aspartic proteases can be  
54 specifically inhibited by pepstatin A. Molecular weights of aspartic proteases  
55 commonly range between 30 to 50 kDa, while some can weigh up to 55 kDa. Aspartic  
56 proteases are generally considered as acidic proteases, because they have isoelectric  
57 points of 3.0–4.5 and show optimal activity at pH 3.0–5.0. Most aspartic proteases

58 have an optimal temperature in the range of 30–50 °C, while some exhibit maximum  
59 activity at 55 °C. Most aspartic proteases are also sensitive to high temperatures and  
60 show poor thermostability, limiting their applications to mesophilic conditions. Thus,  
61 the thermal stability of aspartic proteases has been the subject of attention in many  
62 recent studies (4). The discovery of novel thermostable enzymes, especially from  
63 extremophiles, is a potential method to tackle the aforesaid problem (2, 5).

64 Aspartic proteases are wide spread in many organisms—vertebrates, insects,  
65 plants, fungi and even viruses have been widely reported as sources of aspartic  
66 proteases (6). The production of aspartic proteases from fungi has several advantages  
67 including short productive cycle, simple late purification, and low costs (7). Most  
68 commercial aspartic proteases used currently in industrial production are derived from  
69 filamentous fungi. Aspartic proteases from fungi are mainly categorized into two  
70 groups—pepsin-like and rennin-like enzymes (8). The pepsin-like enzymes include  
71 aspergillopepsin (9), penicillopepsin (10), trichodermapepsin (11) and rhizopuspepsin  
72 (12); while the rennin-like enzymes are mainly produced by *Mucor*, *Rhizomucor* and  
73 *Chryphonectria* (3). However, the yield of fungal aspartic proteases by industrial  
74 fermentation is usually low. An aspartic protease from *Aspergillus foetidus* was  
75 extracellularly produced with a activity of only 63.7 U/mL (13). *Pichia pastoris* is an  
76 excellent expression system that has been effectively used to solve the problems of  
77 low yield of proteases. Many aspartic proteases have been heterogeneously expressed  
78 in *P. pastoris* (14, 15, 16). An aspartic protease from *Rhizomucor miehei* was  
79 produced in *P. pastoris* with the activity of 3480.4 U/mL (17).

80 Typical aspartic proteases are initially synthesized in the form of inactive  
81 precursors (zymogens), which protect host cells from proteolysis (6). The functions of  
82 the N-terminal pro-segments of aspartic proteases have been studied extensively and  
83 include facilitating correct folding, blocking the active site, and stabilizing the protein  
84 (18, 19). It is generally accepted that the propeptides are auto-catalytically cleaved at  
85 acidic pH (20, 21, 22), and their further processing by other peptidases is important  
86 for the activation of aspartic proteases from *Candida parapsilosis* (23). Crystal  
87 structures of some aspartic protease zymogens and their activation intermediates have  
88 been reported (20, 21, 24, 25, 26), which contribute to the understanding of  
89 propeptide interactions with catalytic proteins. Current studies on zymogen activation  
90 have mainly concentrated on aspartic proteases associated with diseases (22, 27), yet  
91 little is known about this process among aspartic proteases from fungi. There is  
92 evidence that the predicted zymogens vary in length depending on each fungus,  
93 suggesting their unique activation processes (6). Therefore, studying the activation  
94 processing of fungal aspartic proteases is of great significance to understand the mode  
95 of activation of the whole family.

96 Given the importance of novel and thermostable aspartic proteases in industrial  
97 processes, a gene coding for a novel thermostable aspartic protease, *Tlapa1*, was  
98 found and cloned from the thermophilic filamentous fungus *Talaromyces leycettanus*.  
99 Phylogenetic analysis indicated that *TLAPA1* belonged to a new subgroup of aspartic  
100 proteases A1 family. Moreover, *TLAPA1* has been previously expressed in *P. pastoris*  
101 in its zymogen form and its auto-activation has been studied in detail. The

102 auto-activation process of *TLAPA1* was affected by pH and enzymatic activity, and  
103 occurred in two stages distinguished by the presence of a processing intermediate.  
104 The mature proteases with activity were subsequently purified and characterized  
105 biochemically. In this study, a novel thermostable aspartic protease was discovered  
106 and synthesized as a zymogen in *P. pastoris*, and its autocatalytic activation was  
107 studied.

## 108 RESULTS

109 **Gene cloning and sequence analysis.** The gene encoding a novel aspartic protease  
110 zymogen was identified from the genome of *Talaromyces leycettanus* and named as  
111 *proTlapal*. The DNA sequence (MK108371 in the GenBank database) had 1275 bp  
112 consisting of 3 introns and 4 exons. *proTlapal* encode a polypeptide of 424 amino  
113 acids including a putative signal peptide of 19 residues and a propeptide of 61  
114 residues at the N-terminus. The molecular mass and *pI* value were estimated to be 42.5  
115 kDa and 4.7, respectively. Three *N*-glycosylation sites (N144, N253 and N357) were  
116 predicted using the NetNGlyc 1.0 Server. The deduced amino acid sequence of  
117 *proTlapal* shared the highest identity of 70.3 % with the aspergillopepsin A-like  
118 aspartic endopeptidase from *Byssochlamys spectabilis* (GAD91729, 28), and of only  
119 41.4% with a functionally characterized aspergillopepsin-1 from *Aspergillus oryzae*  
120 RIB40 (Q06902, 29). Among aspartic proteases with determined three-dimensional  
121 structures, *proTlapal* (residues 86 to 405) showed the highest identity (41.7%) with  
122 the corresponding domain of the mature aspartic protease (PDB 1IZD) from  
123 *Aspergillus oryzae* (30).

124 **Phylogenetic analysis of *TIAPA1*.** The results of BLASTP analysis showed that  
125 *TIAPA1* belonged to the A1 family of aspartic proteases. However, this family of  
126 proteases comprises of many subgroups with complex evolutionary relationships. To  
127 obtain a clear evolutionary relationship between *TIAPA1* and other homologs of the  
128 A1 family, a phylogenetic analysis based on the amino acid sequence alignment was  
129 performed using MEGA 7.0. These results indicated that aspartic proteases from

130 different microorganism were separated from each other in the evolutionary tree (Fig.  
131 1). Seven subgroups that had been reported in previous studies emerged in the process  
132 of evolution in the following order: aspergillopepsin, penicillopepsin, trichoderpepsin,  
133 podosporapepsin, endothiapepsin, rhizopuspepsin, and murcorpepsin subgroups.  
134 However, *TIAPA1* did not belong to any of these subgroups. *TIAPA1* along with  
135 Q4WZS3 from *Aspergillus fumigates* belonged to a new clade in the evolutionary tree  
136 (Fig. 1). This clade emerged after the formation of the rhizopuspepsin subgroup in the  
137 evolutionary tree. The evolutionary position of *TIAPA1* suggested that *TIAPA1* might  
138 have unique characteristics distinct from other aspartic peptidases.

139 **Heterologous expression and purification of proenzyme.** The zymogen pro*TIAPA1*,  
140 consisting of the N-terminal propeptide and the mature domain, was expressed in *P.*  
141 *pastoris* GS115. Expression of the recombinant protein was confirmed by  
142 electrophoresis. As shown by SDS-PAGE (Fig. 2), a specific protein band  
143 corresponding to a molecular mass of approximately 53 kDa was obtained, which was  
144 higher than the calculated value (45 kDa) of pro*TIAPA1*. Upon treating the samples  
145 with Endo H, the target band appeared at approximately 45 kDa. The first five  
146 residues of purified pro*TIAPA1* were V-P-A-P-S, as identified by N-terminal amino  
147 acid sequence analysis. These results indicated that *TIAPA1* was produced in the form  
148 of a zymogen in *P. pastoris* GS115.

149 **Process of auto-activation.** The inactive precursors of aspartic proteases were  
150 usually auto-catalytically activated under acidic conditions. In this study, the  
151 processing of the zymogen conversion was determined by SDS-PAGE and N-terminal



152 amino acid sequencing. As shown in Fig. 3, the activation process had been already  
153 initiated at 0 min of incubation at a room temperature (about 25 °C), indicating the  
154 rapidity of the process, potentially due to disintegration of zymogens in the reaction  
155 whose pH had been adjusted to 3.5 before incubation. The appearance of two new  
156 bands was accompanied by the weakening of the zymogen band (50 kDa) before 30  
157 min of incubation (Fig. 3). The molecular weights of the two new products were 45  
158 kDa and 40 kDa, and their first 5 residues were identified as L-D-F-E-P and  
159 V-A-Q-P-A, respectively. After 90 min of incubation at room temperature at pH 3.5,  
160 the pro*TIAPA1* was completely converted to a 40 kDa band (Fig. 3). We suspected  
161 that the 45 kDa product was an intermediate in the conversion process of pro*TIAPA1*  
162 to mature *TIAPA1*, and the processing sites on this 45 kDa product were confirmed by  
163 N-terminal sequencing. The above results indicated that the precursors pro*TIAPA1*  
164 could be processed into its mature form in an intermolecular manner, and two  
165 processing sites (L67-L68, D85-V86) of pro*TIAPA1* auto-activation were identified.

166 **Effects of proteolytic activity on auto-activation processing.** As previous studies  
167 have illustrated, processing induced auto-activation was related to its own proteolytic  
168 activity. Pepstatin A is a specific inhibitor of aspartic protease, which can effectively  
169 inhibit its protease activity. Hence, the effect of pepstatin A on the zymogen  
170 conversion of *TIAPA1* was examined at a concentration of 5  $\mu$ M of pepstatin A.  
171 Electrophoretic analyses revealed that upon pepstatin A treatment, the apparent  
172 molecular mass of the pro*TIAPA1* decreased from 50 to 45 kDa (Fig. 4). The first 5  
173 amino acid residues of processed proteins (45 kDa) were determined as L-D-F-E-P,

174 which were identical to the cleavage intermediate of *TLAPA1*. This result indicated  
175 that auto-processing intermediates (45 kDa products) were produced in the presence  
176 of pepstatin A. However, the mature protein (40 kDa) was not obtained even upon  
177 prolonged the incubation time up to 3 h. This demonstrated that the activation process  
178 from intermediates to mature proteins was inhibited by pepstatin A. Hence, we  
179 concluded that the activation process from intermediates to mature protein was  
180 accompanied by proteolytic processing. We also studied the effect of catalytic residue  
181 of *TLAPA1* on zymogen conversion by replacing the catalytic Asp103 residue with  
182 Asn. This showed that although the catalytic mutant did not prevent processing of the  
183 precursor into the 45 kDa intermediate, it terminated the auto-activation of  
184 pro*TLAPA1* in the intermediate stage (data not shown). The above results show that  
185 the two phases of the auto-activation process of pro*TLAPA1* were independent of each  
186 other, and the activity of aspartic proteases had greater effect on the latter stage rather  
187 than on the former.

188 **Effect of pH on auto-activation processing.** The auto-activation processing of  
189 aspartic proteases is often triggered by low pH. To determine the optimum pH of  
190 zymogen conversion, this processing was executed in range of pH 3.0–6.0, and the  
191 proteolytic activities of treated samples were detected using casein (1%, w/v) as a  
192 substrate, during the processing of the aspartic protease zymogen. During prolonged  
193 incubation at pH 3.0, the proteolytic activities were increased and the enzyme activity  
194 peaked after 60 min (Fig. 5A). We speculated that the precursor was almost  
195 completely processed after 60 min of incubation at pH 3.0, which was confirmed by

196 SDS-PAGE (Fig. 5B, pH 3.0). The processing induced auto-activation at pH 4.0 and  
197 pH 3.0 were comparable, although complete activation at pH 4.0 required longer  
198 incubation time (about 90 min). As shown in Fig. 5A, the increasing of proteolytic  
199 activities was absent at pH 6.0, and no differences in protein bands were observed  
200 (Fig. 5B, pH 6.0). This indicated that zymogen pro*Tl*APA1 was not converted at pH  
201 6.0. Interestingly, the precursor band was cleaved at pH 5.0 (Fig. 5B), although the  
202 final activity was dramatically lower than at pH 3.0 and pH 4.0. In order to understand  
203 the reason for the lowered activity at pH 5.0, the N-terminal amino acid sequences of  
204 mature proteins at pH 3.0 and pH 5.0 were determined, and found to be V-A-Q-P-A  
205 and A-V-Q-G-G. This demonstrated that two different mature proteins were  
206 generated— *Tl*APA1 at pH 3.0 and M2-*Tl*APA1 at pH 5.0, however, the mature protein  
207 M2-*Tl*APA1 was inactive. In conclusion, precursors of aspartic proteases could be  
208 activated at the range of pH 3.0–4.0, while auto-activation occurred most efficiently at  
209 pH 3.0, which is closest to the optimum pH of mature aspartic protease.

210 **Biochemical characterization of *Tl*APA1.** The enzymatic characteristics of mature  
211 aspartic proteases *Tl*APA1 and M2-*Tl*APA1 were assessed using casein (1%, w/v) as a  
212 substrate. *Tl*APA1 showed the highest activity at pH 3.5 (Fig. 6A), similar to that that  
213 seen in most fungal aspartic proteases. As shown in Fig. 6B, *Tl*APA1 had an optimal  
214 temperature of 60 °C, which was higher than aspartic proteases obtained from most  
215 other fungi. We further measured stabilities of aspartic protease *Tl*APA1 under  
216 different pH and temperature conditions. *Tl*APA1 retained greater than 80 % of its  
217 initial activity after 60 min of incubation at 37 °C over a range of pH 2.0–6.0 (Fig.

218 6C). The stability at acidic pH makes *TlAPA1* favorable for applications in food,  
219 beverages, and brewing industries. Fig. 6D shows that *TlAPA1* was extremely stable  
220 below 55°C, retaining almost all of its initial activity after 1 h of incubation. At higher  
221 temperatures, half-life of *TlAPA1* was 30 min at 60 °C and 5 min at 65 °C. The  
222 thermostability of *TlAPA1* was higher than that of highly homologous aspartic  
223 proteases from other fungi. M2-*TlAPA1* activity was not detected at any of the  
224 aforementioned temperature and pH conditions. Purified recombinant *TlAPA1* had a  
225 specific activity of  $2187.4 \pm 67.3 \text{ U}\cdot\text{mg}^{-1}$ , while the  $K_m$ ,  $V_{\max}$ ,  $k_{\text{cat}}$ , and  $k_{\text{cat}}/K_m$  values  
226 were determined as  $1.9 \text{ mg}\cdot\text{mL}^{-1}$ ,  $2,321 \text{ }\mu\text{mol}\cdot\text{min}^{-1}\cdot\text{mg}^{-1}$ ,  $1,410 \text{ s}^{-1}$  and  $723.5$   
227  $\text{mL}\cdot\text{s}^{-1}\cdot\text{mg}^{-1}$ , respectively.

228

## 229 DISCUSSION

230 Novel enzymes with unique characteristics such as pH adaption, thermostability  
231 and tolerance to metal ions are in valuable for research and industrial purposes (31).  
232 Extremophiles are excellent sources of novel enzymes that can retain their integrity  
233 and function under extreme reaction conditions (32). *Talaromyces leycettanus*  
234 JCM12802, a thermotolerant fungus, that has an optimal growth temperature of 42 °C,  
235 is the source of various thermostable hydrolases including  $\beta$ -mannanase (33),  
236 xylanase (34),  $\beta$ -glucanase (35), and  $\alpha$ -Amylase (36). In this study, a novel aspartic  
237 protease precursor comprising of 424 amino acid residues was identified in  
238 *Talaromyces leycettanus* and was determined to be a member of the A1 family of  
239 aspartic proteases.

240 A1 family, the most well studied one of the 16 families of aspartic proteases, is

241 further subdivided into 5 super families (AA, AC, AD, AE, and AF) (37). Pfam  
242 protein family prediction indicated that *TIAPA1* belonged to the A1 family, one that  
243 contains many biochemically-characterized enzymes including pepsin, chymosin,  
244 rennin, and cathepsin D (37, 38). When full sequences of the A1 family proteins were  
245 used for phylogenetic analysis, the phylogenetic tree indicated *TIAPA1* as a sister to  
246 an uncharacterized aspartic protease Q4WZS3 from *Aspergillus fumigates*, whose  
247 clade has not yet been discovered (Fig. 1). Phylogenetic analysis is able to provide  
248 deeper insights into the evolution of a new clade. The phylogenetic tree showed that  
249 *TIAPA1* largely differed with other homologs in terms of the amino acid sequence,  
250 indicating that *TIAPA1* potentially had distinct enzyme characteristics and special  
251 applications like the mucorpepsin subgroup, a unique clade in the evolutionary  
252 process and an important class of proteases, widely used as milk coagulating agents  
253 (39). The evolution of A1 family has been well studied, which has contributed to an  
254 indepth understanding of fungal aspartic protease evolution (40). Fungal aspartic  
255 proteases have undergone large sequence diversification leading to their evolutionary  
256 complexity (37). To further investigate the evolutionary position of *TIAPA1* among  
257 subgroups of A1 family, a phylogenetic analysis was performed and an evolutionary  
258 tree was constructed (Fig 1). Our analysis suggested *TIAPA1* as a potential  
259 evolutionary intermediate linking rhizopuspepsins and other subgroups.

260 The full amino acid sequence of secreted aspartic proteases contains a propeptide  
261 region followed by a mature protein (6). The pro*TIAPA1* zymogen was composed of  
262 an N-terminal propeptide of 61 residues, and a mature domain of 339 residues. Our

263 results demonstrated that pro*Tl*APA1 could be processed auto-catalytically into the  
264 mature aspartic protease under acidic conditions, consistent with other homologs (41).  
265 However, the N-terminal propeptide of pro*Tl*APA1 precursor was processed  
266 auto-catalytically in two phases. Firstly, precursors were processed into intermediates  
267 driven by pH-dependent structural changes that were not affected by a specific  
268 inhibitor or the D103N mutation. Secondly, the process that turned intermediates into  
269 mature enzymes was auto-catalyzed by enzymes; that could be stalled in the presence  
270 of a specific inhibitor or mutation of active residues. We further studied the  
271 conversion processing of pro*Tl*APA1 at different pH conditions and determined that  
272 the optimum pH of conversion was similar to that of its peak activity. Interestingly,  
273 when we activated the zymogens at pH 5.0, a minor mature protein band was  
274 generated in SDS-PAGE. This auto-processing site (S98-A99) was also confirmed by  
275 N-terminal sequencing, and was located 13 residues downstream of the first mature  
276 site. However, the mature products at pH 5.0 had no proteolytic activity (Fig 7). The  
277 large differences in the processing of pro*Tl*APA1 compared to other homologs could  
278 arise from the N-terminal propeptide of *Tl*APA1 precursor (Fig.S1). The N-terminal  
279 propeptide of *Tl*APA1 precursor showed low sequence identity (< 30%) to other  
280 known aspartic proteases. The N-terminal propeptide of *Tl*APA1 precursor possessed  
281 an additional 61 residues with a greater abundance of arginine residues, compared to  
282 other homologs (Fig.S1). We thus speculated that the sequence peculiarity of  
283 N-terminal pro-segment lead to the special auto-activation processing of the *Tl*APA1  
284 precursor.

285 Generally, aspartic proteases exhibit activities and stabilities in the acidic pH  
286 range (20). Purified *TlAPA1* showed a peak activity at pH 3.5, and was stable over the  
287 pH range of 3.0 to 6.0. These characteristics were similar to the homologs from other  
288 fungi, including *Monascus pilosus* (42), *Trichoderma asperellum* (14), and *A. foetidus*  
289 (13). The acidic adaptation of *TlAPA1* makes it a promising candidate in many  
290 industries including cheese manufacturing, juice clarification, and leather softening.  
291 *TlAPA1* also hydrolyzed proteins at higher temperatures. Its optimal activity was  
292 recorded at 60 °C and greater than 80% of the maximal activity was remained at  
293 65 °C. The temperature optimum of *TlAPA1* is higher than most reported homologs  
294 (Table 2). *TlAPA1* retains greater than 80 % of its original activity after incubation at  
295 55 °C for 30 min, indicating superior thermostability of *TlAPA1* compared to most  
296 other aspartic proteases that are commonly stable at 45°C and below (Table 2). The  
297 thermostability of *TlAPA1* is a favorable characteristic its potential application in  
298 many areas. For example, during proteolysis, most substrate proteins are resistant to  
299 proteases because of their structural stability at moderate temperatures. At higher  
300 temperatures, substrate proteins become unfold and their cleavage sites become  
301 exposed and accessible to the catalytic enzyme. This suggests more efficient  
302 hydrolysis of *TlAPA1* substrates at high temperatures, due to the thermostable nature  
303 of *TlAPA1*.

304 In summary, a novel aspartic protease, *TlAPA1*, was identified, that belonged to  
305 a new clade in the phylogenetic tree. The sequence analysis of the propeptide region  
306 showed that pro*TlAPA1* could have a unique mechanism of auto-activation processing.

307 The results indicated that there are two steps in the processing of auto-activation, and  
308 a 45 kDa intermediate was confirmed. Moreover, the characteristics of mature protein  
309 *T/APA1* demonstrated that it is excellent in terms of specific activity and  
310 thermostability.



## 311 MATERIALS AND METHODS

312 **Strains, vectors and substrates.** The gene donor strain of *Talaromyces leycettanus*  
313 JCM12802 was purchased from Japan Collection of Microorganisms RIKEN  
314 BioResource Center. *Escherichia coli* Trans1-T1 (TransGen) was used for gene  
315 cloning and sequencing. Target gene was expressed in *P. pastoris* GS115 (Invitrogen).  
316 Cloning and expression vectors used were pEASy-T3 (TransGen, Beijing, China) and  
317 pPIC9 (Invitrogen, Carlsbad, CA), respectively. Casein sodium salt from bovine milk  
318 (C8654, Sigma-Aldrich, St. Louis, MO) was used as a substrate, and other chemicals  
319 of analytical grade were commercially available.

320 **Cloning of aspartic protease *Tlapa1* gene.** *Talaromyces leycettanus* was cultivated  
321 as described previously (36). DNA and total RNA were extracted from the mycelia of  
322 *T. leycettanus* JCM12802 after 3 day of growth at 42 °C, and the cDNA was prepared  
323 according to the manufacturer's instructions (TOYOBO, Osaka, Japan). The *Tlapa1*  
324 gene was amplified from DNA and cDNA of *Talaromyces leycettanus*, respectively,  
325 by polymerase chain reaction (PCR) method. The primer pairs used in this study are  
326 listed in Table 1. Finally, the PCR products were cloned into the pEASY-T3 and  
327 sequenced.

328 **Bioinformatic analysis of *Tlapa1* gene.** The sequence results were assembled using  
329 DNA Star 7.1 software. The amino acid sequences obtained by the Vector NTI  
330 Advance 10.0 software (Invitrogen) were searched with BLASTp programs  
331 (<http://www.ncbi.nlm.nih.gov/BLAST/>) to analyze the homologous sequences. The  
332 signal peptide sequence of *TLAPA1* was predicted with SignalP

333 (<http://www.cbs.dtu.dk/services/SignalP/>). The potential *N*-glycosylation sites were  
334 predicted using NetNGlyc 1.0 Server (<http://www.cbs.dtu.dk/services/NetNGlyc/>).  
335 Alignment of multiple protein sequences was accomplished using Clustal W software  
336 (<http://www.clustal.org/>) and rendered using the ESPript 3.0 program  
337 (<http://esprict.ibcp.fr/ESPript/cgi-bin/ESPriptcgi>).

338 **Phylogenetic analysis.** The full amino acid sequence of *TIAPA1* was used as the  
339 query sequence in BLASTp searches in NCBI (<http://blast.ncbi.nlm.nih.gov/Blast.cgi>).

340 In total, 22 sequences of A1 family aspartic proteases were obtained. Multiple  
341 sequence alignments of *TIAPA1* with other representative aspartic proteases enzymes,  
342 characterized enzymes, and enzymes with determined three-dimensional (3D)  
343 structures, were performed as described previously (37). Sequence information for the  
344 A1 family of aspartic proteases was obtained from the MEROPS database  
345 ([https://www.ebi.ac.uk/merops/cgi-bin/family\\_index?type=P#A](https://www.ebi.ac.uk/merops/cgi-bin/family_index?type=P#A)). Phylogenetic

346 analyses of *TIAPA1* and A1 family of aspartic proteases were performed as described  
347 in previous studies (37). The distance matrix for nucleotides was calculated by  
348 Kimura's two-parameter model. The phylogenetic tree was constructed with the  
349 neighbor-joining method using MEGA 7.0 and assessed using 1,000 bootstrap  
350 replications (46).

351 **Expression and purification of zymogens.** Recombinant proteins were expressed in  
352 *P. pastoris* GS115, as described previously (36). Briefly, the gene fragment coding for  
353 the zymogen (pro*TIAPA1*) without the signal peptide was amplified using PCR  
354 method. PCR products were digested with *EcoRI* and *NotI* and ligated into the pPIC9

355 plasmid using T4 DNA ligase (New England Laboratory). The recombinant plasmid  
356 pPIC9-pro*Tlapa1*, linearized by *Bg*III, was transformed into *P. pastoris* GS115  
357 competent cells by electroporation. Positive transformants were screened based on the  
358 transparent zone on skim milk plates as described below. The transformants showing  
359 the largest transparent zones were inoculated into 30 mL YPD and incubated at 30 °C.  
360 The seed medium containing the positive transformant was inoculated into 1 L conical  
361 flasks containing 300 mL of BMGY for fermentation. Conical flasks containing 200  
362 mL of BMMY and 0.5% (v/v) methanol were prepared.

363 The cells were harvested by centrifugation for 10 min at 12,000g, and  
364 resuspended in BMMY medium and for next subsequent fermentation at 30 °C.  
365 Methanol was added every 24 h to obtain a final concentration of 0.5% (v/v). After  
366 48h of cultivation, cell-free cultures were centrifuged at 12,000 rpm, 4 °C for 10  
367 min and fermentation broth was collected. The crude pro-enzymes were concentrated  
368 using an ultrafiltration membrane with a molecular weight cut-off of 10 kDa  
369 (Vivascience, Hannover, Germany). A HiTrap Q Sepharose XL 5 mL FPLC column  
370 (GE Healthcare, Sweden) was used for purification. Protein binding and equilibration  
371 was performed using buffer A (10 mM sodium phosphate, pH 6.0), and a linear  
372 gradient of NaCl (0–1.0 M) was used to elute the proteins.

373 **Activation of purified zymogen pro*TlAPA1*.** To determine processing of zymogen  
374 conversion, pH of the pro*TlAPA1* samples were adjusted to 3.0 using 0.5 M lactic  
375 acid-sodium lactate buffer. pro*TlAPA1* was auto-catalytically activated at 37 °C for 0,  
376 15, 30, 45, 60, 75, and 90 min, respectively. Processed polypeptides were detected by

377 SDS-PAGE and N-terminal sequencing. To study the effect of pepstatin A on the  
378 zymogen conversion of pro*TIAPA1*, 5  $\mu$ M pepstatin A was added into the conversion  
379 system before the auto-catalytic processing and incubated at 37 °C for 15, 30, 45, and  
380 60 min, respectively. Zymogen conversion systems were subjected to sodium dodecyl  
381 sulfate-polyacrylamide gel electrophoresis (SDS-PAGE) analysis. Samples without  
382 pepstatin A were also treated similarly, as a control group. To determine the optimum  
383 pH of zymogen conversion, the pH of the pro*TIAPA1* samples were adjusted to 2.0,  
384 3.0, 4.0, 5.0, and 6.0 using 0.5 M lactic acid-sodium lactate buffer. The samples at  
385 different pH conditions were incubated at 37 °C, and the proteolytic activities were  
386 analyzed with casein (1%, w/v) at different incubation times. Finally, the samples  
387 were analyzed using SDS-PAGE.

388 **Enzyme activity assay.** The activity of aspartic proteases was assayed in a 1000  $\mu$ l  
389 reaction mixture containing 500  $\mu$ l of 1 % (w/v) casein sodium salt and 500  $\mu$ l  
390 enzyme sample in buffer at pH 3.0. After incubation at 60 °C for 10 min, 1000  $\mu$ l of  
391 40 % (w/v) trichloroacetic acid (TCA) was added to terminate the reaction. 500  $\mu$ L of  
392 the supernatant was obtained from the mixture using centrifugation after 12,000g for  
393 3 min. 2.5 mL of 0.4 M sodium carbonate and 500  $\mu$ L Folin-phenol was added into  
394 supernatant in turn before incubating at 40 °C for 20 min. The amount of released  
395 tyrosine was measured at 680 nm. One unit of proteolytic activity was defined as the  
396 amount of enzyme that released 1  $\mu$ mol of tyrosine equivalent per minute under the  
397 conditions described above (pH 3.5, 60 °C and 10 min).

398 **Properties of recombinant aspartic protease *TIAPA1*.** Optimal conditions for

399 purified *TlAPA1* activity were measured in lactic acid-sodium lactate buffer under the  
400 following conditions— temperatures ranging from 30 °C to 80 °C (at a constant pH  
401 3.5); and pH ranging from 2.0 to 4.5 (at a constant temperature of 60 °C).  
402 Thermostability and pH stability of *TlAPA1* were assessed by preincubating the  
403 purified enzyme for 1 h in lactic acid-sodium lactate buffer under varying temperature  
404 conditions: 55 °C, 60 °C and 65 °C (at constant pH of 3.5); or varying pH conditions:  
405 pH 2.0–11.0 (at constant temperature of 37 °C), respectively, and then determining the  
406 residual enzyme activity.

407 The proteolytic activities of *TlAPA1* were measured under standard conditions  
408 (pH 3.5, 60 °C, 10 min) with 0.5–10 mg/mL casein sodium salt, and the constants  
409 were determined by linear regression fitting using GraphPad Prism version 7.01. All  
410 experiments were performed in three biological and technical replicates.

411 **N-terminal Sequencing.** Purified proteins were separated by SDS-PAGE and electro  
412 transferred onto a polyvinylidene difluoride (PVDF) membrane. Stained with  
413 Coomassie Brilliant Blue R-250, the target protein bands were excised and subjected  
414 to N-terminal amino acid sequence analysis using a PPSQ-33 automatic sequence  
415 analysis system (Shimadzu, Kyoto, Japan).

#### 416 **ACKNOWLEDGEMENTS**

417 This work was supported by the National Key Research and Development  
418 Program of China (2016YFD0501409-02), the Fundamental Research Funds for  
419 Central Non-profit Scientific Institution (Y2017JC31), and the China Modern  
420 Agriculture Research System (CARS-41).

421 **REFERENCE**

- 422 1. Raveendran S, Parameswaran B, Ummalyama SB, Abraham A, Mathew AK,  
423 Madhavan A, Rebello S, Pandey, A. 2018. Applications of microbial enzymes in  
424 food industry. *Food Technol Biotechnol* 56:16–30.
- 425 2. Zhang Y, He S, Simpson BK. 2018. Enzymes in food bioprocessing—novel food  
426 enzymes, applications, and related techniques. *Curr Opin in Food Sci* 19:30–35.
- 427 3. Yegin S, Fernandez-Lahore M, Salgado AJG, Guvenc U, Goksungur Y, and Tari  
428 C. 2011. Aspartic proteinases from *Mucor* spp. in cheese manufacturing. *Appl*  
429 *Microbiol Biotechnol* 89:949–960,
- 430 4. Silva RR, Suoto TB, Oliveira TB, Oliveira LCG, Karcher D, Juliano MA, Juliano  
431 L Oliveira AHC, Rodrigues A, Rosa, JC. 2016. Evaluation of the catalytic  
432 specificity, biochemical properties, and milk clotting abilities of an aspartic  
433 peptidase from *Rhizomucor miehei*. *J Ind Microbiol Biotechnol* 43:1059–1069.
- 434 5. Kangwa M, Salgado JAG, Fernandez-Lahore, HM. 2018. Identification and  
435 characterization of N-glycosylation site on a *Mucor circinelloides* aspartic  
436 protease expressed in *Pichia pastoris*: effect on secretion, activity and  
437 thermo-stability. *AMB Express* 8:157–170.
- 438 6. Mandujano-González V, Villa-Tanaca L, Anducho-Reyes MA, Mercado-Flores, Y.  
439 2016. Secreted fungal aspartic proteases: A review. *Rev Iberoam Micol* 33:76–82.
- 440 7. Souza PM, Bittencourt MLD, Caprara CC, Freitas M, Almeida RPC, Silveira D,  
441 Fonseca YM, Ferreira EX, Pessoa A, Magalhaes, PO. 2015. A biotechnology  
442 perspective of fungal proteases. *Braz J Microbiol* 46:337–346.

- 443 8. Rao MB, Tanksale AM, Ghatge MS, Deshpande VV. 1998. Molecular and  
444 biotechnological aspects of microbial proteases. *Microbiol Mol Biol Rev*  
445 62:597–635.
- 446 9. Vishwanatha KS, Rao AGA, Singh SA. 2009. Characterisation of acid protease  
447 expressed from *Aspergillus oryzae* MTCC 5341. *Food Chem* 114:402–407.
- 448 10. Fraser ME, Strynadka NC, Bartlett PA, Hanson JE, James MN. 1992.  
449 Crystallographic analysis of transition-state mimics bound to penicillopepsin:  
450 phosphorus-containing peptide analogues. *Biochemistry* 31:5201–5214.
- 451 11. Nascimento AS, Krauchenco S, Golubev AM, Gustchina A, Wlodawer A,  
452 Polikarpov I. 2008. Statistical coupling analysis of aspartic proteinases based on  
453 crystal structures of the *Trichoderma reesei* enzyme and its complex with  
454 pepstatin A. *J Mol Biol* 382:763–778.
- 455 12. Kumar S, Sharma NS, Saharan MR, Singh R. 2005. Extracellular acid protease  
456 from *Rhizopus oryzae*: purification and characterization. *Process Biochem*  
457 40:1701–1705.
- 458 13. Souza PMD, Werneck G, Aliakbarian B, Siqueira F, Ferreira FEX, Perego P,  
459 Converti A, Magalhaes PO, Junior AP. 2017. Production, purification and  
460 characterization of an aspartic protease from *Aspergillus foetidus*. *Food Chem*  
461 *Toxicol* 109:1103–1110.
- 462 14. Yang X, Cong H, Song J, Zhang J. 2013. Heterologous expression of an aspartic  
463 protease gene from biocontrol fungus *Trichoderma asperellum* in *Pichia pastoris*.  
464 *World J Microbiol Biotechnol* 29:2087–2094.

- 465 15. Yegin S, Fernandez-Lahore M. 2013. A thermostable aspartic proteinase from  
466 *Mucor mucedo* DSM 809: gene identification, cloning, and functional expression  
467 in *Pichia pastoris*. Mol Biotechnol 54:661–672.
- 468 16. Gama Salgado JA, Kangwa M, Fernandez-Lahore M. 2013. Cloning and  
469 expression of an active aspartic proteinase from *Mucor circinelloides* in *Pichia*  
470 *pastoris*. BMC Microbiol 13:250–260.
- 471 17. Sun Q, Chen F, Geng F, Luo Y, Gong S, Jiang Z. 2018. A novel aspartic protease  
472 from *Rhizomucor miehei* expressed in *Pichia pastoris* and its application on meat  
473 tenderization and preparation of turtle peptides. Food Chem 245:570–577.
- 474 18. Koelsch G, Mareš M, Metcalf P, Fusek, M. 1994. Multiple functions of pro-parts  
475 of aspartic proteinase zymogens. FEBS Lett 343:6–10.
- 476 19. Horimoto Y, Dee DR, Yada RY. 2009. Multifunctional aspartic peptidase  
477 prosegments, N Biotechnol 25:318–324.
- 478 20. Richter C, Tanaka T, Yada RY. 1998. Mechanism of activation of the gastric  
479 aspartic proteinases: pepsinogen, progastricsin and prochymosin. Biochem J  
480 335:481–490.
- 481 21. Khan AR, Khazanovich-Bernstein N, Bergmann EM, James MNG. 1999.  
482 Structural aspects of activation pathways of aspartic protease zymogens and viral  
483 3C protease precursors. Proc Natl Acad Sci USA 96:10968–10975.
- 484 22. Dunn BM. 2002. Structure and mechanism of the pepsin-like family of aspartic  
485 peptidases. Chem Rev 102:4431–4458.
- 486 23. Dostal J, Dlouha H, Malon P, Pichova I, Hruskova-Heidingsfeldova O. 2005. The



- 487 precursor of secreted aspartic proteinase sapp1p from *Candida parapsilosis* can  
488 be activated both autocatalytically and by a membrane-bound processing  
489 proteinase. *Biol Chem* 386:791–799.
- 490 24. Morales R, Watier Y, Bocskei Z. 2012. Human prorenins structuresheds light on a  
491 novel mechanism of its autoinhibition and on its non-proteolytic activation by the  
492 (pro)renin receptor. *J Mol Biol* 421:100–111.
- 493 25. Lee AY, Gulnik SV, Erickson JW. 1998. Conformational switching in an aspartic  
494 proteinase. *Nat Struct Biol* 5:866–871.
- 495 26. Ostermann N, Gerhartz B, Worpenberg S, Trappe J, Eder J. 2004. Crystal  
496 structure of an activation intermediate of cathepsin E. *J Mol Biol* 342:889–899.
- 497 27. Hanova I, Brynda J, Houstecka R, Alam N, Sojka D, Kopacek P, Maresova L,  
498 Vondrasek J, Horn M, Schueler-Furman O, Mares M. 2018. Novel structural  
499 mechanism of allosteric regulation of aspartic peptidases via an evolutionarily  
500 conserved exosite. *Cell Chem Biol* 25:318–329
- 501 28. Oka T, Ekino K, Fukud K, Nomura Y. 2014. Draft Genome Sequence of the  
502 Formaldehyde-Resistant Fungus *Byssochlamys spectabilis* No. 5. *Genome*  
503 *Announc* 2:e01162–13
- 504 29. Gomi K, Arikawa K, Kamiya N, Kitamoto K, Kumagai C. 1993. Cloning and  
505 nucleotide sequence of the acid protease-encoding gene (pepA) from *Aspergillus*  
506 *oryzae*. *Biosci Biotechnol Biochem* 57:1095–1100.
- 507 30. Kamitori S, Ohtaki A, Ino H, Takeuchi M. 2003. Crystal structures of *Aspergillus*  
508 *oryzae* aspartic proteinase and its complex with an inhibitor pepstatin at 1.9Å

- 509 resolution. *J Mol Biol* 326:1503–1511.
- 510 31. Ferrer M, Monica Martinez-Martinez, Bargiela R, Streit WR, Golyshina, OV,  
511 Golyshin PN. 2016. Estimating the success of enzyme bioprospecting through  
512 metagenomics: current status and future trends. *Microb Biotechnol* 9:22–34.
- 513 32. Haki GD, Rakshit SK. 2003. Developments in industrially important  
514 thermostable enzymes: a review. *Bioresour Technol* 89:17–34.
- 515 33. Wang C, Luo H, Niu C, Shi P, Huang H, Meng K, Bai Y, Wang K, Hua H, Yao B.  
516 2015. Biochemical characterization of a thermophilic  $\beta$ -mannanase from  
517 *Talaromyces leycettanus* JCM12802 with high specific activity. *Appl Microbiol*  
518 *Biotechnol* 99:1217–1228.
- 519 34. Wang X, Ma R, Xie X, Liu W, Tu T, Zheng F, You S, Ge J, Xie H, Yao B, Luo H.  
520 2017. Thermostability improvement of a *Talaromyces leycettanus* xylanase by  
521 rational protein engineering. *Sci Rep* 7:152–187.
- 522 35. You S, Tu T, Zhang L, Wang Y, Huang H, Ma R, Shi PJ, Bai YG, Su XY, Lin ZM,  
523 Luo HY, Yao B. 2016. Improvement of the thermostability and catalytic  
524 efficiency of a highly active  $\beta$ -glucanase from *Talaromyces leycettanus*  
525 JCM12802 by optimizing residual charge–charge interactions. *Biotechnol*  
526 *Biofuels* 9:124–135.
- 527 36. Zhang D, Tu T, Wang Y, Li Y, Luo X, Zheng F, Wang X, Bai Y, Huang H, Su X,  
528 Yao B, Zhang T, Luo H. 2017. Improvement of the catalytic performance of a  
529 *Talaromyces leycettanus*  $\alpha$ -amylase by changing the linker length. *J Agric Food*  
530 *Chem* 65:5041–5048.

- 531 37. Revuelta MV, Kan, JALV, Kay J, Have, AT. 2014. Extensive expansion of a  
532 family aspartic proteinases in fungi revealed by evolutionary analyses of 107  
533 complete eukaryotic proteomes. *Genome Biol Evol* 6:1480–1494.
- 534 38. Rawlings ND, and Barrett AJ. 2013. Introduction: aspartic and glutamic  
535 peptidases and their clans, p 3–19. *In* Barrett AJ, Rawlings ND, Woessner JF (ed),  
536 *Handbook of Proteolytic Enzymes*, 3rd ed, vols 2. Elsevier, Amsterdam.
- 537 39. Yegin S, Dekker P. 2013. Progress in the field of aspartic proteinases in cheese  
538 manufacturing: structures, functions, catalytic mechanism, inhibition, and  
539 engineering. *Dairy Sci Technol* 93:565–594.
- 540 40. Rawlings ND, Barrett AJ, Thomas PD, Huang X, Bateman A, Finn RD. 2018.  
541 The *MEROPS* database of proteolytic enzymes, their substrates and inhibitors in  
542 2017 and a comparison with peptidases in the PANTHER database. *Nucleic Acids*  
543 *Res* 46:624–632.
- 544 41. Richter C, Tanaka T, Yada RY. 1998. Mechanism of activation of the gastric  
545 aspartic proteinases: pepsinogen, progastricsin and prochymosin. *Biochem J*  
546 335:481–490.
- 547 42. Lakshman PLN, Toyokawa Y, Toyama H, Taira T, Yasuda M. 2010. Purification  
548 and characterisation of two extracellular acid proteinases from *Monas cuspidosus*.  
549 *Food Chem* 121:1216–1224.
- 550 43. Rao S, Mizutani O, Hirano T, Masaki K, Iefuji H. 2011. Purification and  
551 characterization of a novel aspartic protease from basidiomycetous yeast  
552 *Cryptococcus* sp. S-2. *J Biosci Bioeng* 112:441–446.

- 553 44. Takenaka S, Umeda M, Senba H, Koyama D, Tanaka K, Yoshida KI, Doi M.  
554 2017. Heterologous expression and characterisation of the *Aspergillus* aspartic  
555 protease involved in the hydrolysis and decolorisation of red-pigmented proteins.  
556 J Sci Food Agric 97:95–101.
- 557 45. Kumar S, Stecher G, Tamura K. 2016. Mega 7: molecular evolutionary genetics  
558 analysis version 7.0 for bigger datasets. Mol Biol Evol 33:1870–1874.

559 **Figure legends**

560 **Fig. 1** Phylogenetic analysis of the subgroups of aspartic proteases A1 family. The  
561 amino acid sequences of A1 family were obtained by a BLAST analysis using the  
562 *TlAPA1* protein (GenBank accession number MK108371) as the query sequence. The  
563 evolutionary tree was constructed by the neighbor-joining method. The sequences are  
564 labeled with their GenBank accession numbers and host fungi. Numbers indicated in  
565 the tree branches are the bootstrap values (%) based on 1000 replications. The  
566 subgroups of A1 family are classified using gray shadow and names are indicated in  
567 over striking. *TlAPA1* is shown in red which, together with Q4WZS3, belonged to a  
568 new unknown clade.

569

570 **Fig. 2** SDS-PAGE analysis of the recombinant pro*TlAPA1*. Lane M, molecular mass  
571 standard; Lane 1, crude zymogen pro*TlAPA1*; Lane 2, purified recombinant  
572 pro*TlAPA1*; and Lane 3, deglycosylated zymogen pro*TlAPA1* treated with Endo H.

573

574 **Fig. 3** Analysis of pro*TlAPA1* auto-activation for 90 min. The time course of  
575 processing at room temperature (~20 °C) was analyzed using 12% SDS-PAGE.  
576 Pro*TlAPA1*, recombinant precursor without the signal peptide; Int-*TlAPA1*,  
577 intermediate produced during auto-activation processing; Mat-*TlAPA1*, mature  
578 protein after auto-activation.

579

580 **Fig. 4** Effect of the inhibitor pepstain A on zymogen auto-processing. The

581 auto-activation processing of recombinant zymogens with or without pepstatin A was  
582 analyze using SDS-PAGE at the indicated times. M, molecular mass standard; Pro,  
583 purified zymogens before auto-activation. The processing time of the auto-activation  
584 ranged from 15–60 (min).

585

586 **Fig. 5** Analysis of pro*Tl*APA1 auto-activation at varying pH 3.0–6.0. (a) Proteolytic  
587 activities measured at different times with range of pH 3.0–6.0 at 60 °C. (b)  
588 SDS-PAGE analysis of auto-activation processing at 37 °C with pH 3.0, 5.0, and 6.0.

589

590 **Fig. 6** Characterization of purified mature enzyme *Tl*APA1. (a) pH-activity profile. (b)  
591 Temperature-activity profile. (c) pH-stability profile after 1 h-incubation at 37 °C at  
592 different pH values. (d) Temperature-stability profile after incubation at pH 3.0 and  
593 different temperatures for various durations.

594

595 **Fig. 7** Schematic representation of the signal peptide, the propeptide region and the  
596 mature protein in *Tl*APA1. Pro*Tl*APA1, the recombinant precursor without the signal  
597 peptide; Int-*Tl*APA1, the intermediate produced during auto-activation processing;  
598 *Tl*APA1, mature protein after auto-activation at pH 3.0; M2-*Tl*APA1, mature protein  
599 after auto-activation at pH 5.0.

600

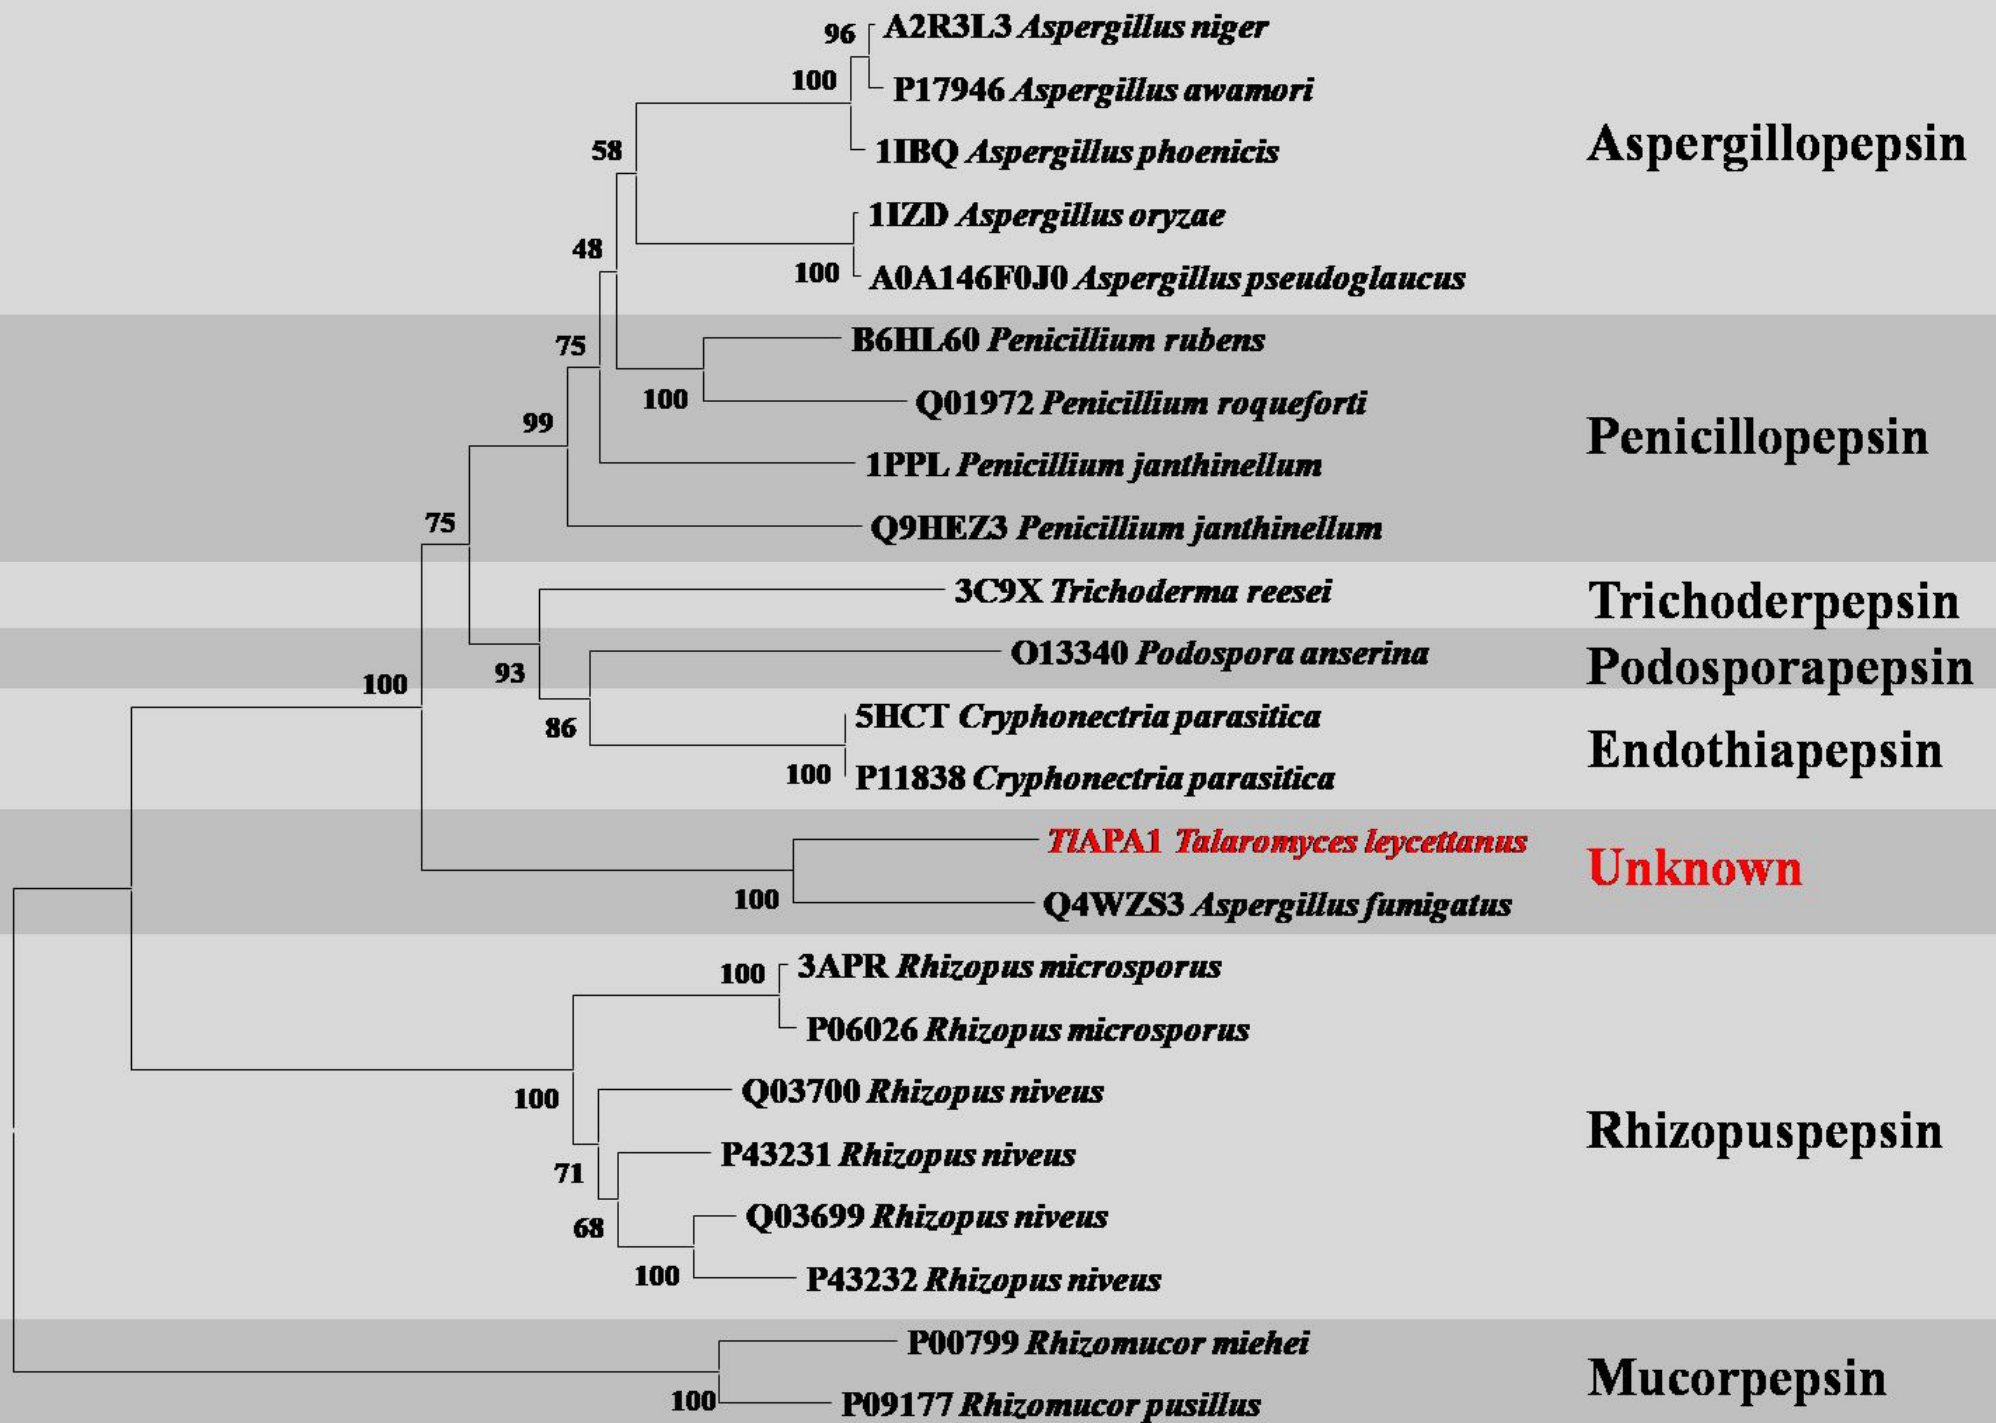

0.1

kDa

M

1

2

3

180

135

100

75

65

45

35

25

15

10

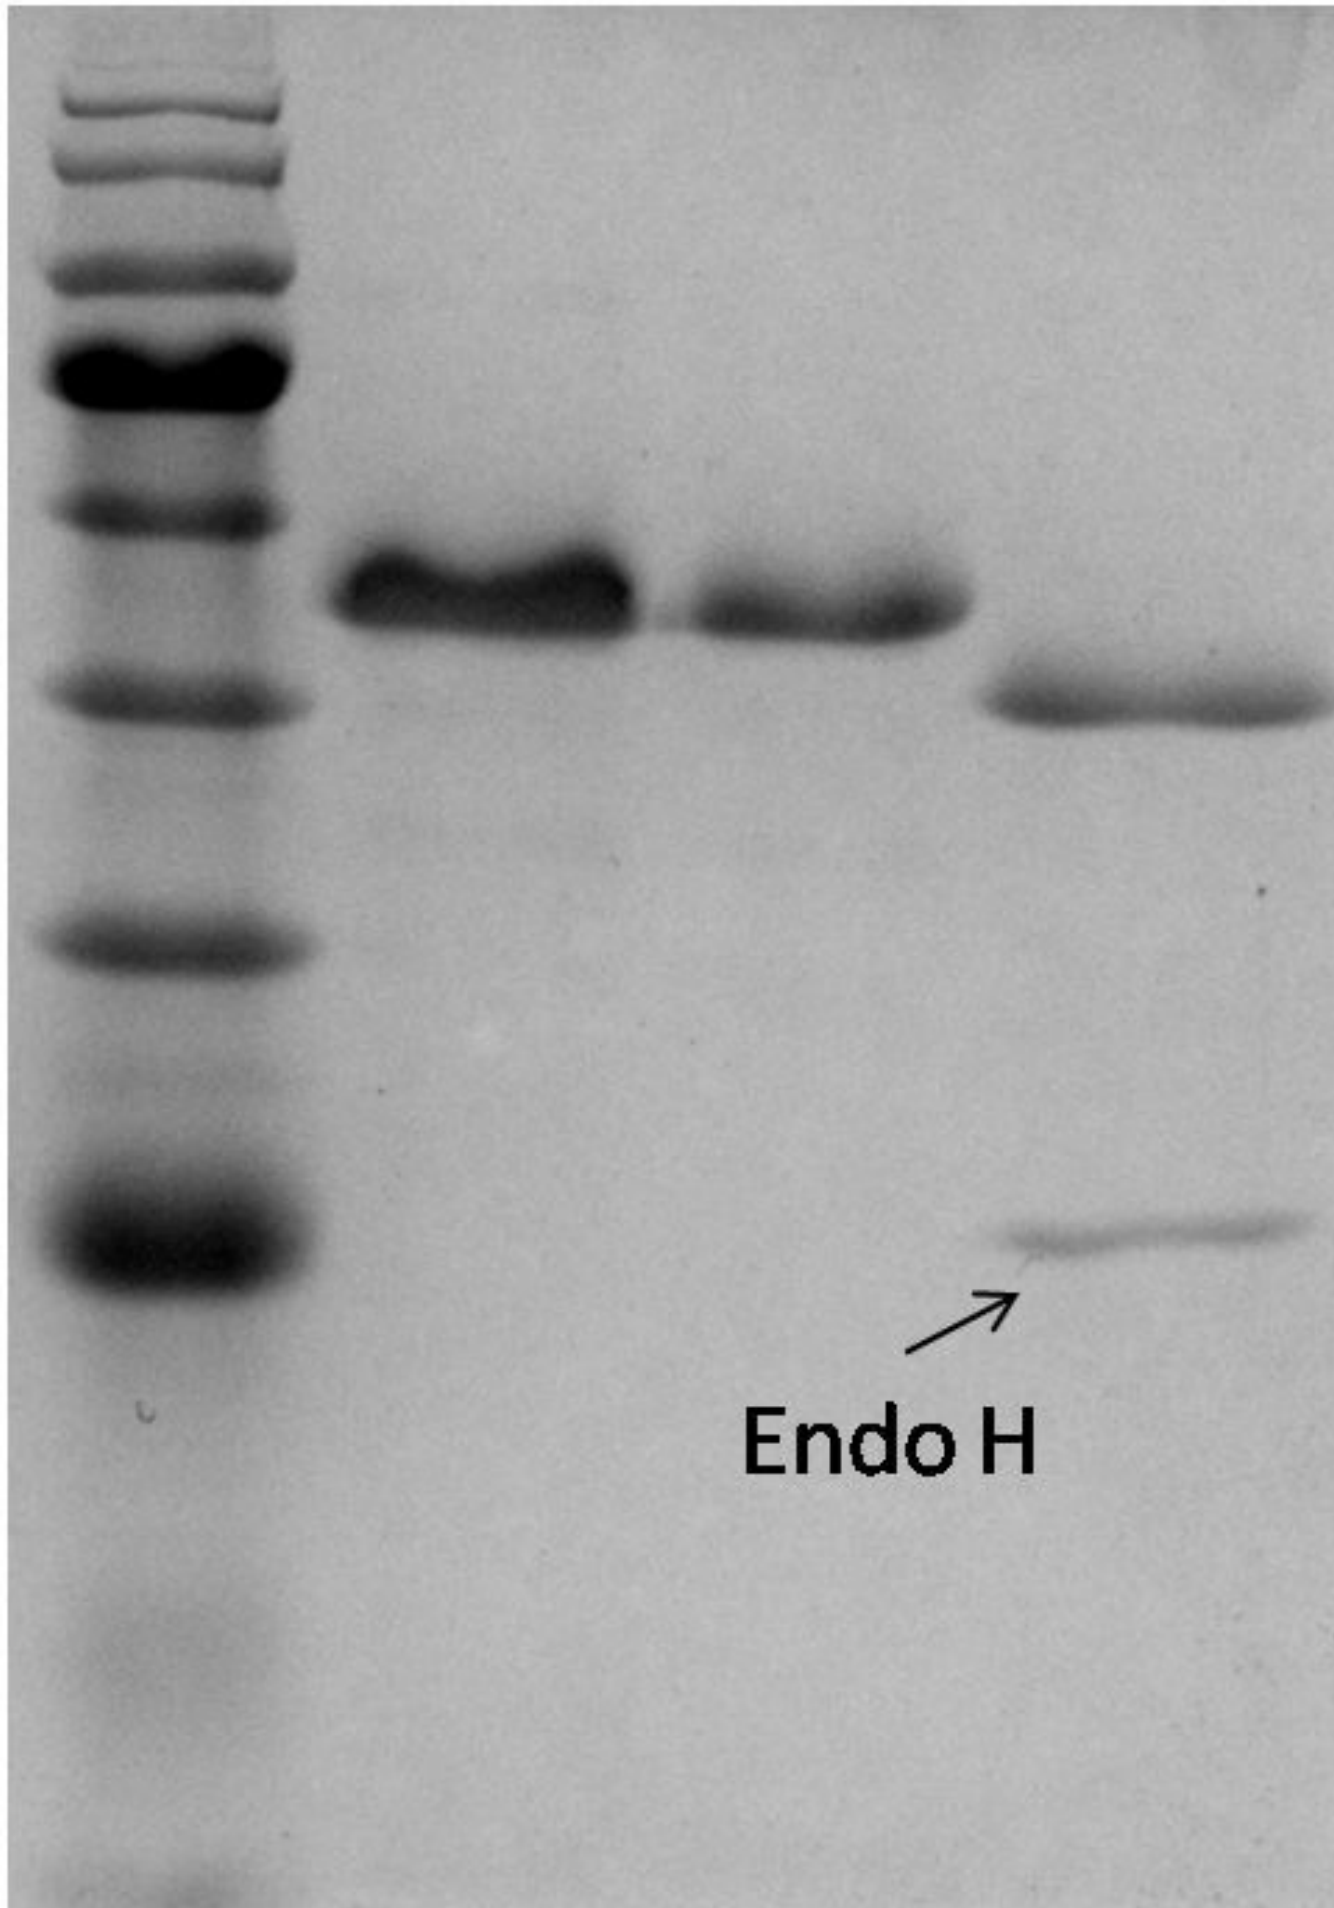

Endo H



**pH 6.0**

**pH 3.5**

**M**

**Pro**

**0 min**

**15 min**

**30 min**

**45 min**

**60 min**

**75 min**

**90 min**

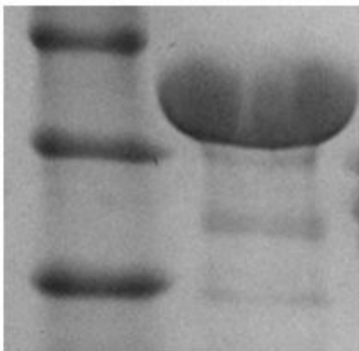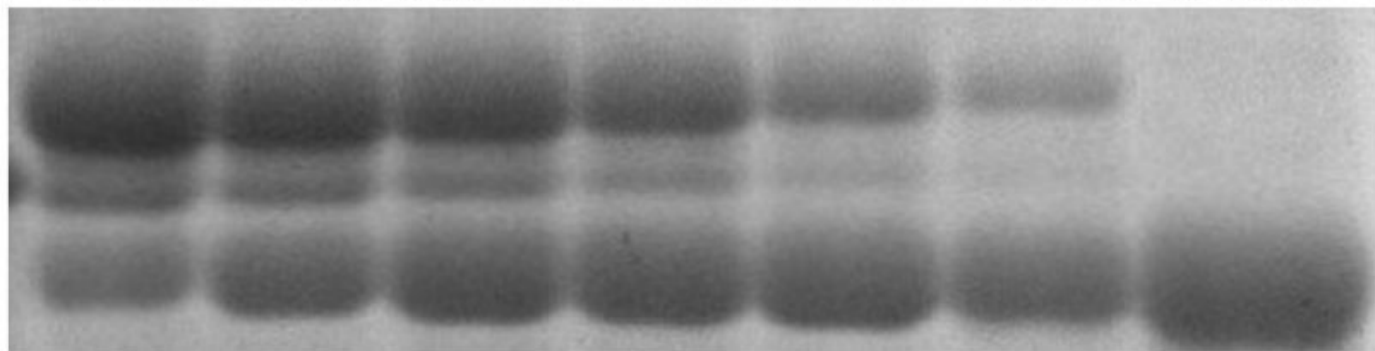

*Pro-TlAPA1*

*Int-TlAPA1*

*Mat-TlAPA1*

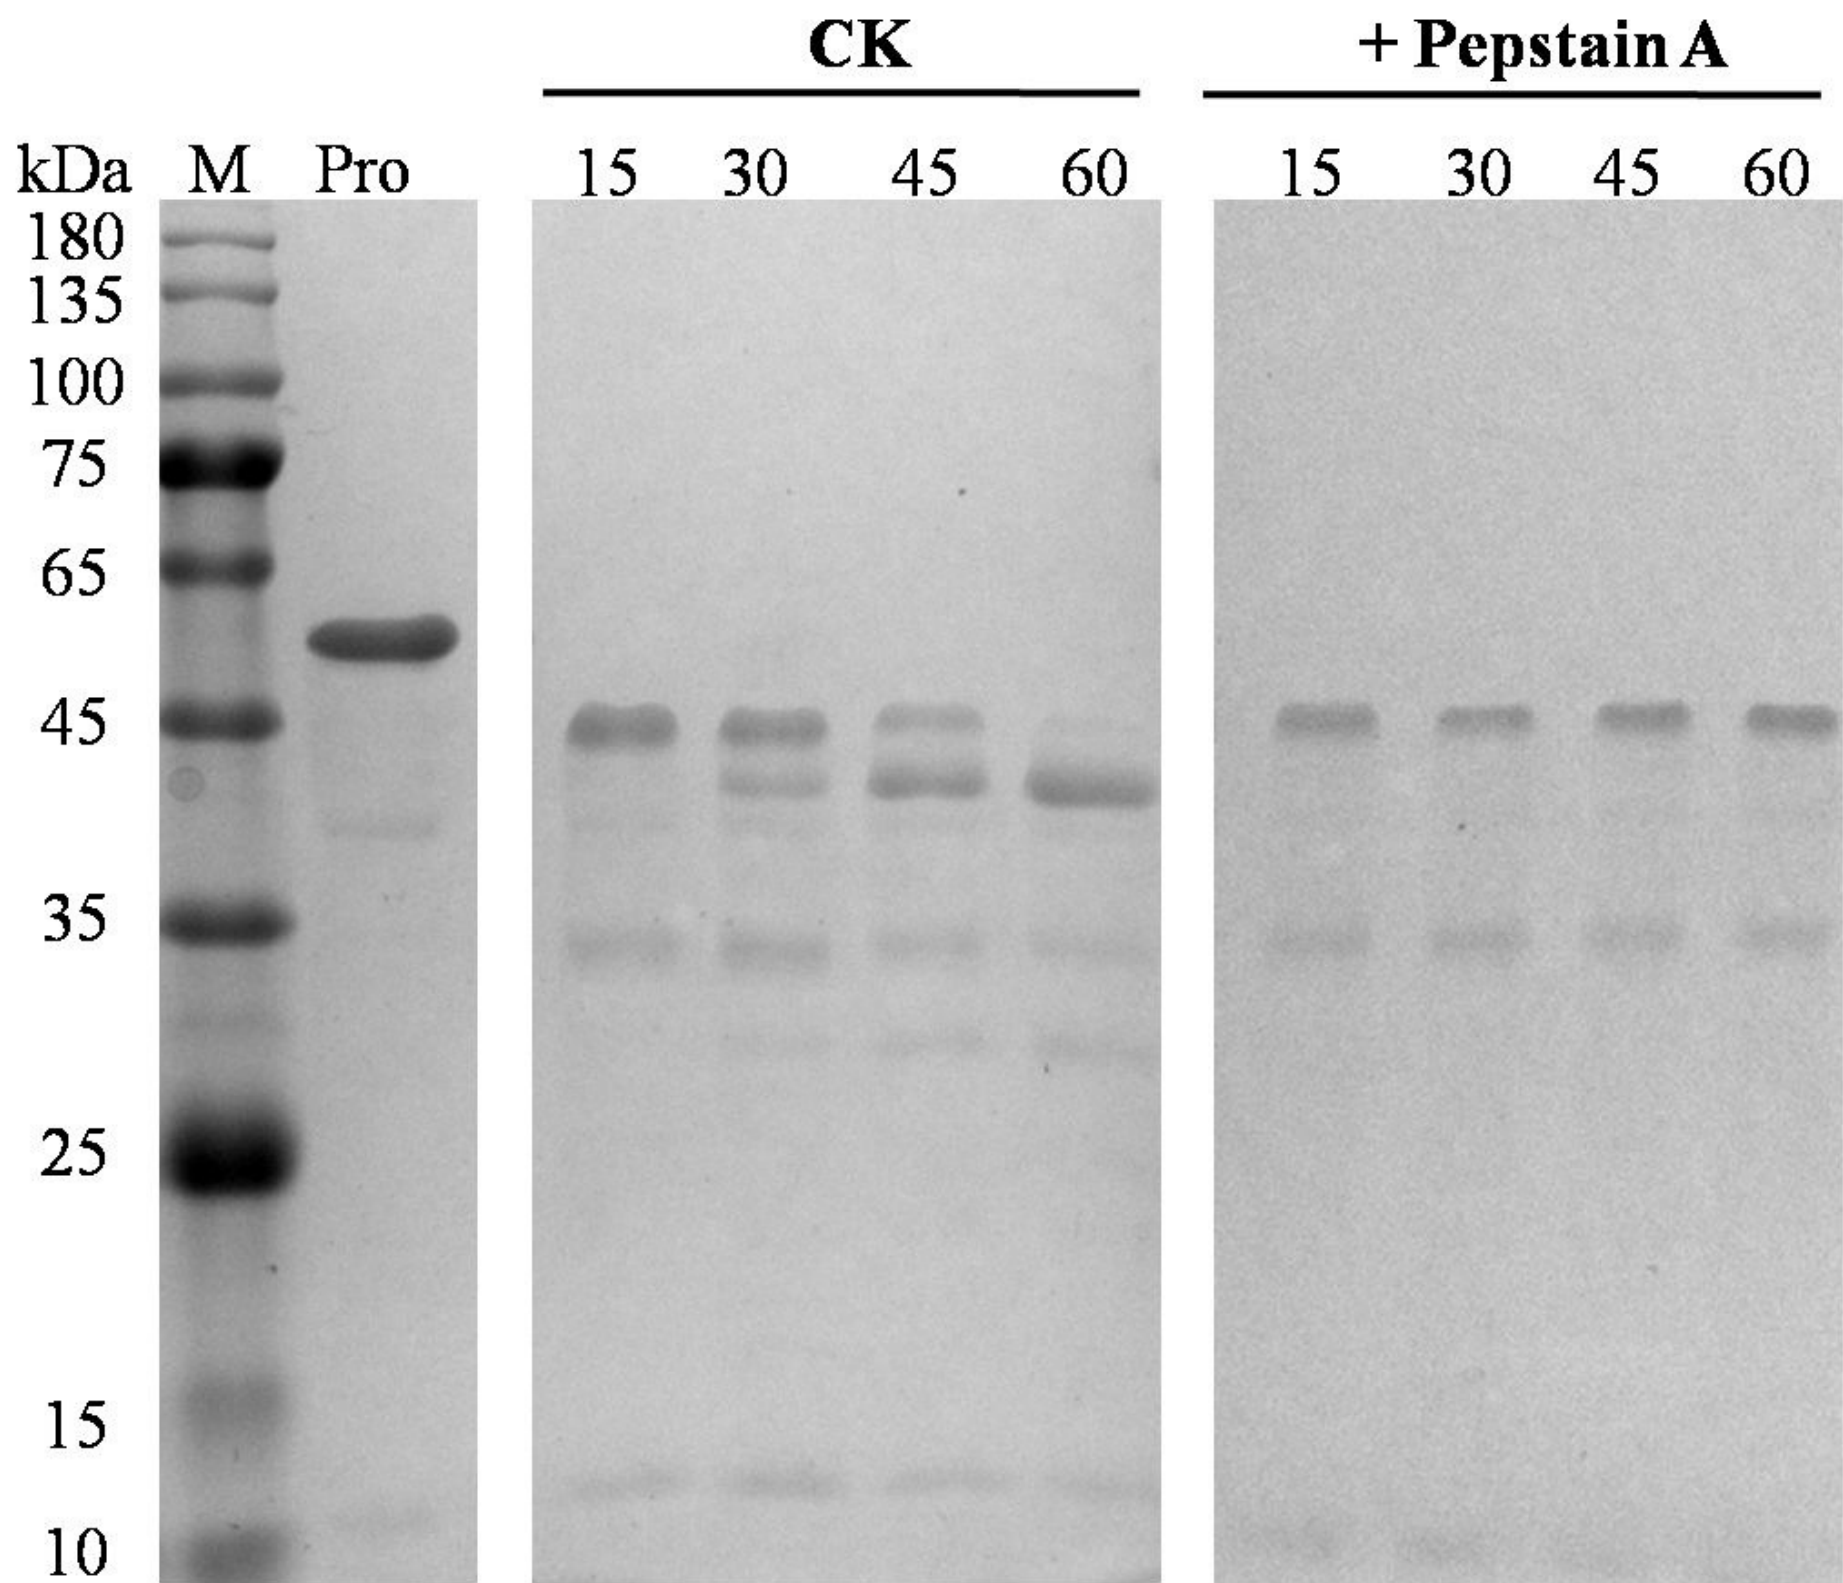

**A**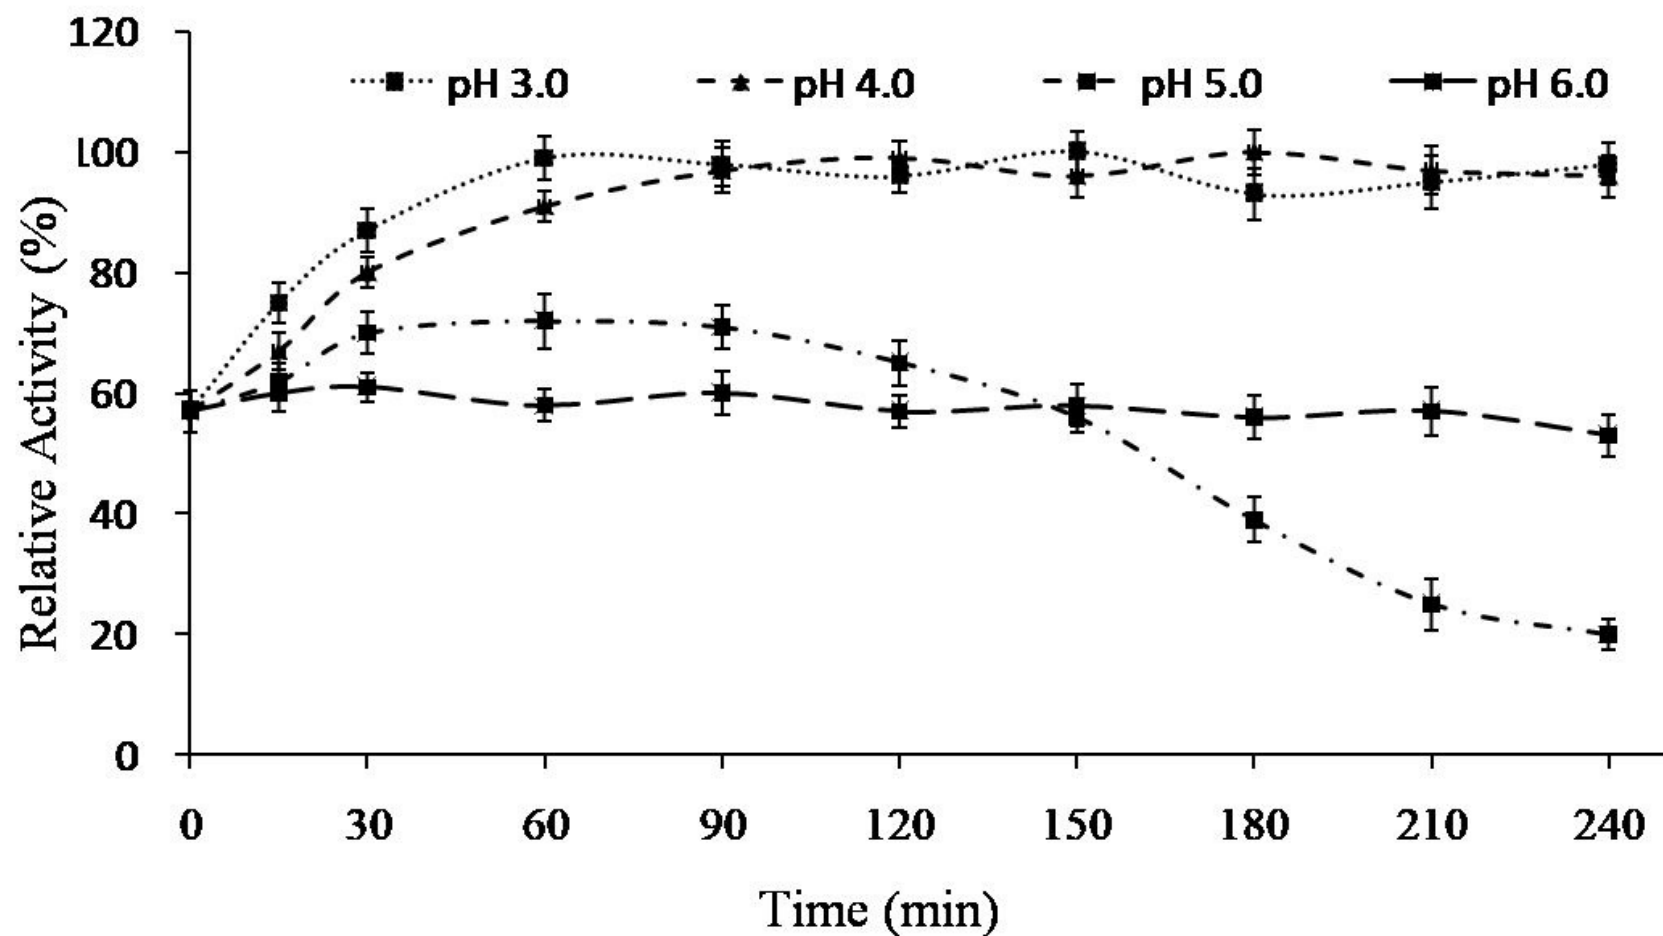**B**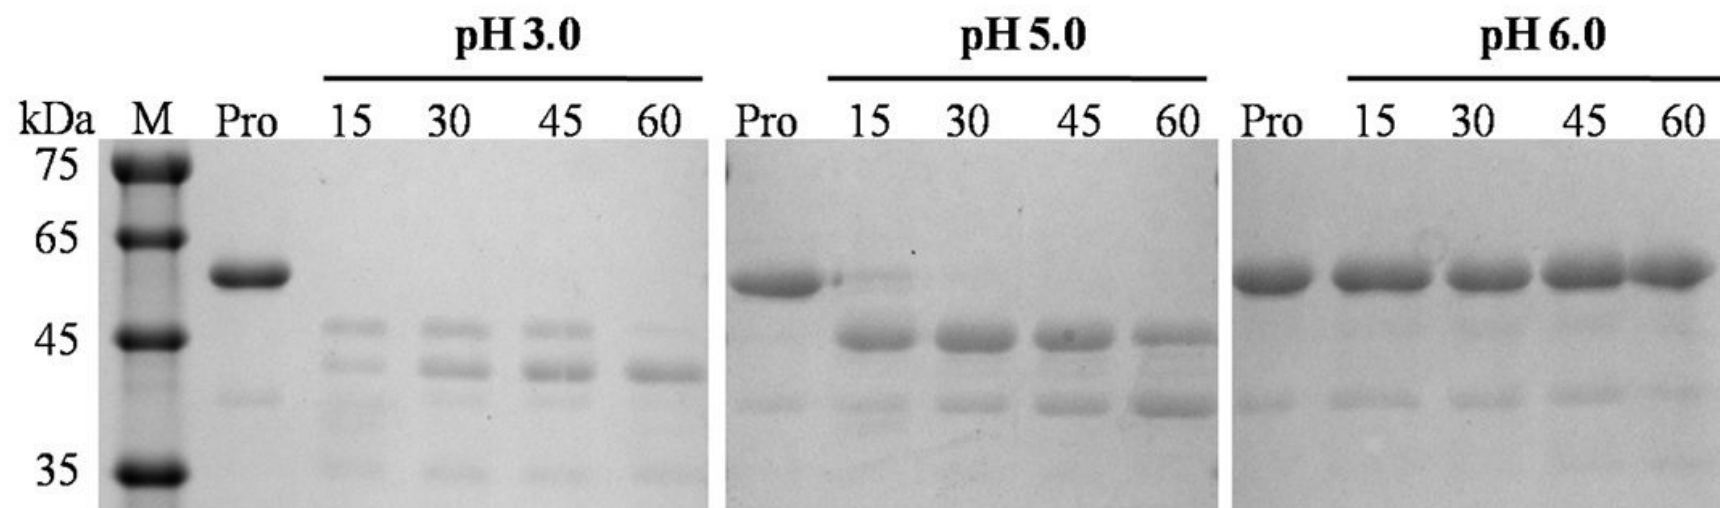

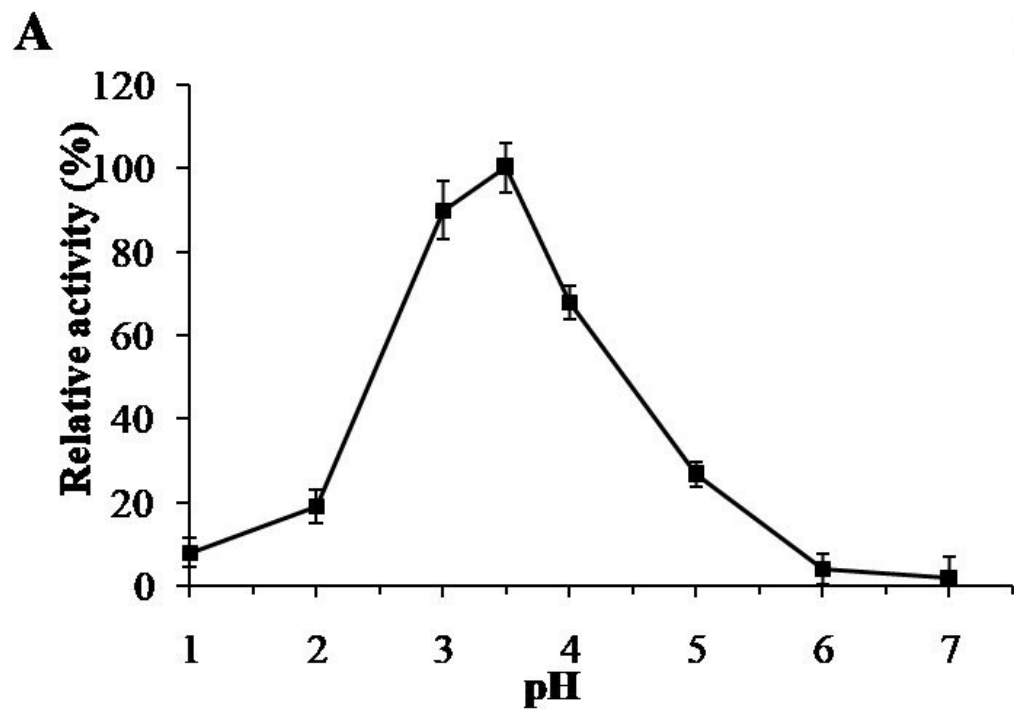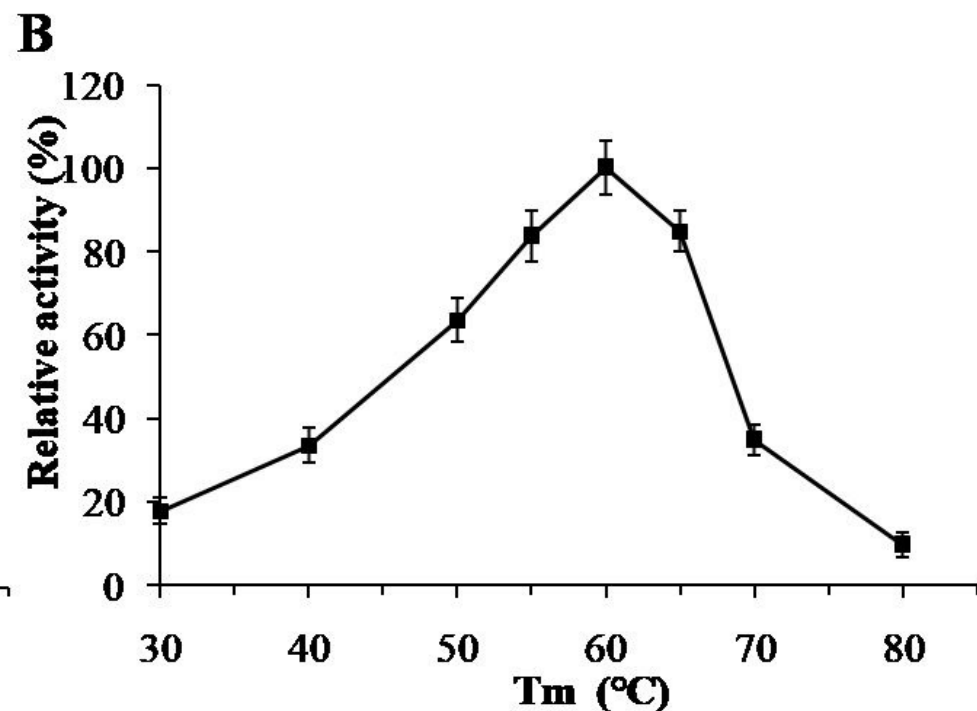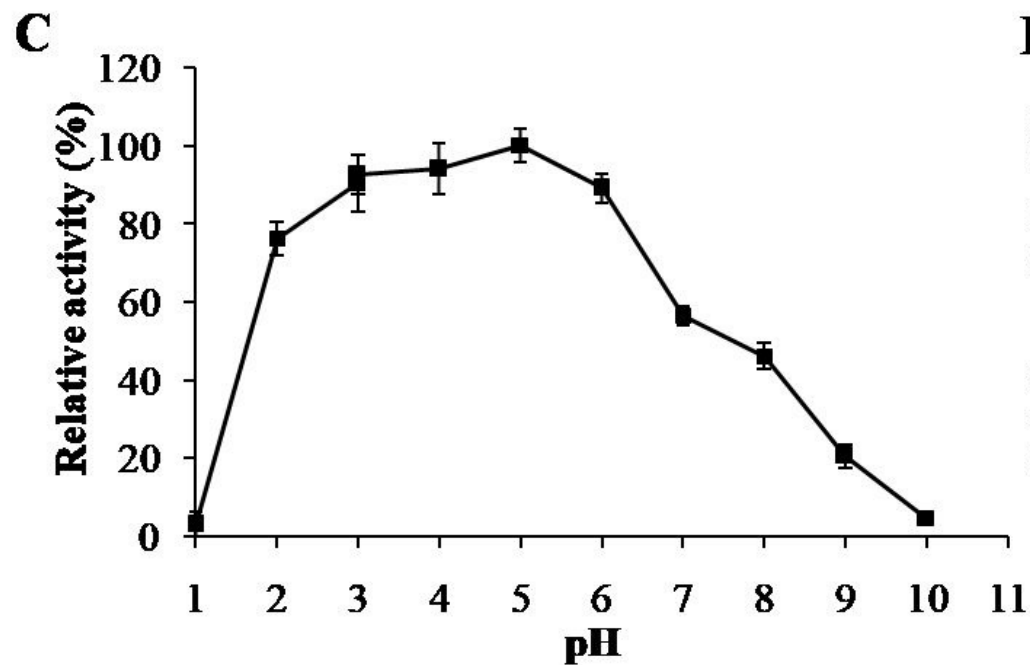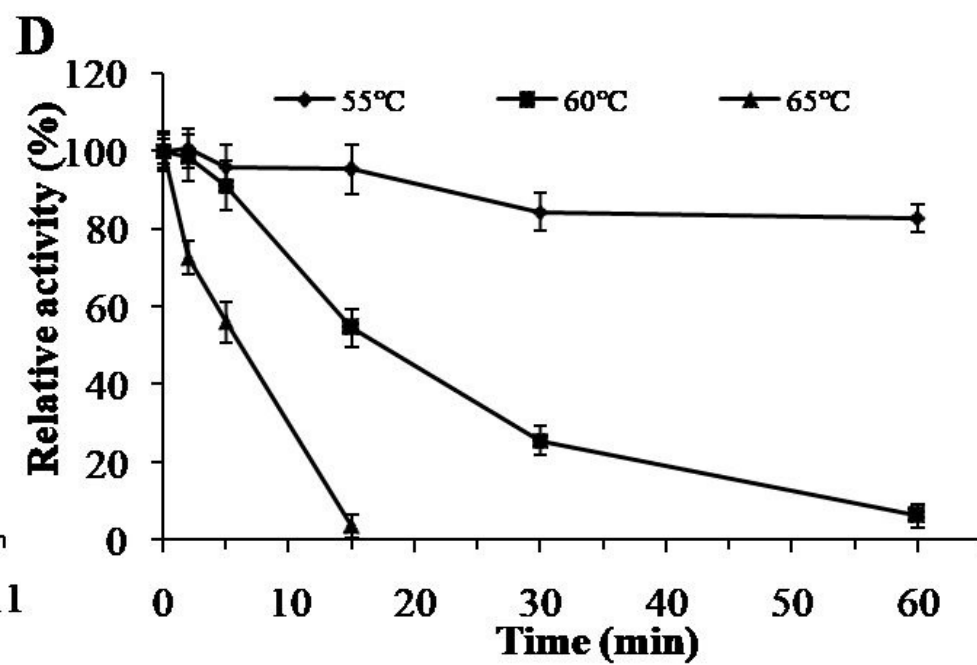

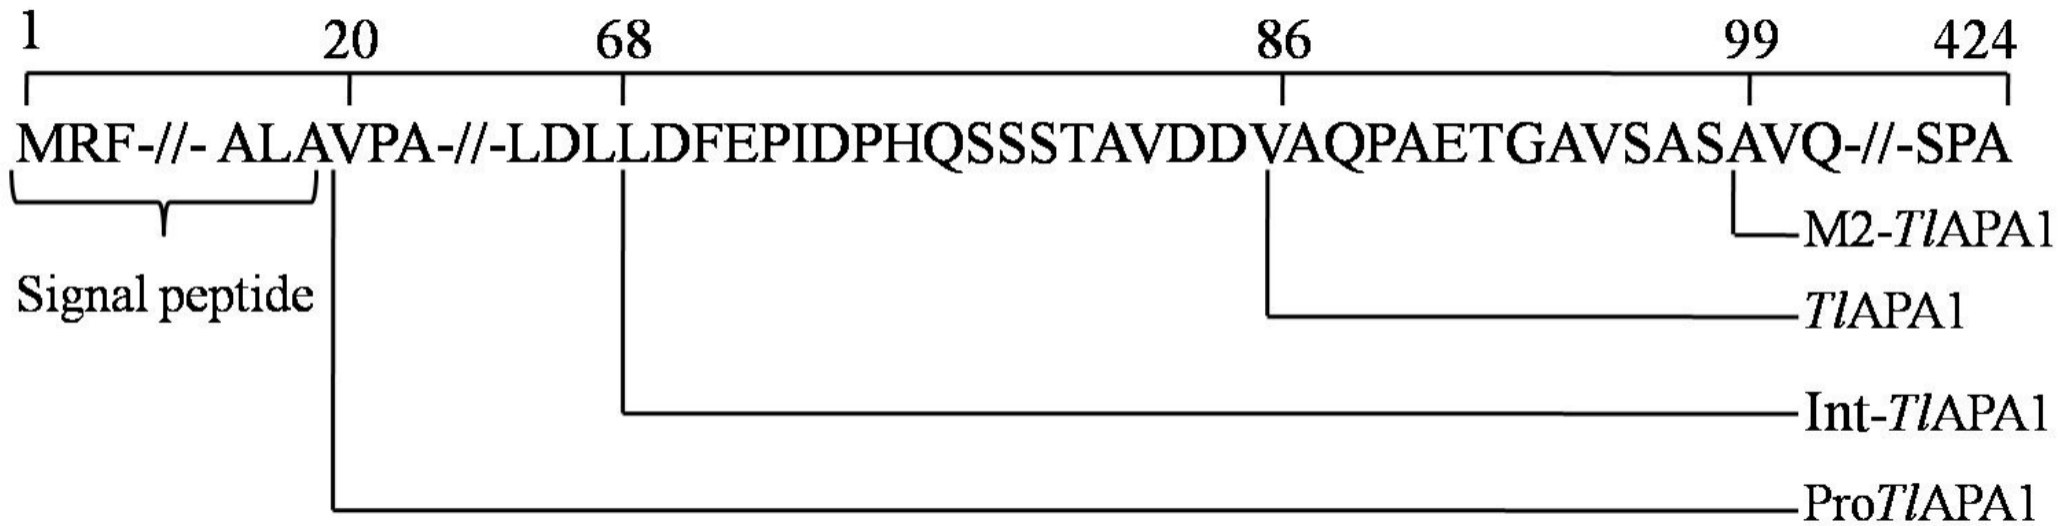

**Table 1 Primers used in this study.**

| Primers       | Sequences (5'→3')                                |
|---------------|--------------------------------------------------|
| <i>Tlpa1F</i> | <u>GGGTACGTA</u> GTCCCGGCTCCTTCGCGGCCT           |
| <i>Tlpa1R</i> | <u>GAGCCTAGGCT</u> ATGCAGGAGATGCAAAACCAAGAGATGGA |

**Table 2 Optimal temperature and thermostability of several aspartic proteases**

| Source                      | Products name | Optimal temperature (°C) | Thermostability (%) | Reference  |
|-----------------------------|---------------|--------------------------|---------------------|------------|
| <i>T. leycettanus</i>       | TIAPA1        | 60                       | 84% (55°C, 30 min)  | This study |
| <i>M. circinelloides</i>    | MCAP          | 60                       | 40% (55°C, 30 min)  | 5          |
| <i>R. miehei</i>            | RmproA        | 55                       | 60% (55°C, 30 min)  | 17         |
| <i>Aspergillus foetidus</i> | AfAP          | 55                       | ND                  | 13         |
| <i>T. asperellum</i>        | TAASP         | 40                       | ND                  | 14         |
| <i>Cryptococcus</i> sp.     | Cap1          | 30                       | 80% (50 °C, 60 min) | 43         |
| <i>M. pilosus</i>           | MpiAP1        | 55                       | 80% (55°C, 30 min)  | 42         |
| <i>A. repens</i>            | PepA_MK82     | 60                       | 80% (50 °C, 20 min) | 44         |

a. the values in the brackets indicate the incubation time at temperature (°C), and the percentages in front of the brackets indicate the residual activity.
